# Supplementary material
Source: PubMed Central journal article supplement (PMC4475898)
Supplement: AEM.04044-14_zam999116367so1.pdf [file AEM.04044-14_zam999116367so1.pdf]

**Supporting information**

**The *Xanthomonas oryzae* pv. *oryzae* PilZ-domain proteins function differentially in cyclic di-GMP binding, and regulation of virulence and motility.**

**Fenghuan Yang<sup>1</sup>, Fang Tian<sup>1</sup>, Huamin Chen<sup>1</sup>, William Hutchins<sup>2</sup>, Ching-Hong Yang<sup>2</sup>, Chenyang He<sup>1\*</sup>**

<sup>1</sup> State Key Laboratory for Biology of Plant Diseases and Insect Pests, Institute of Plant Protection, Chinese Academy of Agricultural Sciences, Beijing 100193, China.

<sup>2</sup> Department of Biological Sciences, University of Wisconsin-Milwaukee, Milwaukee, WI 53211, USA.

\* For correspondence: E-mail [cyhe@caas.net.cn](mailto:cyhe@caas.net.cn); Tel. (+86) 10 62894147.

**Table S1. Primers used in this study.**

| <b>Primer</b> | <b>Sequences( 5'- 3' )</b>                                  | <b>Restriction enzyme/use</b>           |
|---------------|-------------------------------------------------------------|-----------------------------------------|
| 49PF1         | CG <b>GGATCC</b> GTGCTTGTGCCCATGTCCA                        | <i>Bam</i> HI/Protein expression        |
| 49PR1         | CCA <b>AAGCTT</b> TTCAGAACATGCCGCTCTTGC                     | <i>Hind</i> III/Protein expression      |
| 49PF2         | CGGCGCAATCATAACGACCTGGAAA                                   | Protein expression                      |
| 49PR2         | TCGGTGATCGGCGTTTCCAGGTCGTATGATTC                            | Protein expression                      |
| 2374PF1       | CG <b>GGATCC</b> ATGCAGGACACCCGCCG                          | <i>Bam</i> HI/Protein expression        |
| 2374PR1       | CCA <b>AAGCTT</b> TTTAGCCAGCCATGTGCTCTTCG                   | <i>Hind</i> III/Protein expression      |
| 2374PF2       | CG <b>GGATCC</b> ATGCAGGACACCCGCCGCGCACCCGCGGACCCAG<br>CCGA | <i>Bam</i> HI/Protein expression        |
| GmF           | CC <b>GAATTC</b> GACGCACACCGTGAAA                           | <i>Bam</i> HI/Gene deletion             |
| GmR           | GCT <b>CTAGAG</b> CGGCGTTGTGACAATTT                         | <i>Xba</i> I/Gene deletion              |
| 49MF1         | CC <b>GAATTC</b> GGCTCATTCCCTTCATCGTCCA                     | <i>Eco</i> RI/Gene deletion             |
| 49MR1         | CG <b>GGATCC</b> AATAGAAGCGGGAAGGCGC                        | <i>Bam</i> HI/Gene deletion             |
| 49MF2         | GCT <b>CTAGA</b> AACCCGCCCGCACCCGCGC                        | <i>Xba</i> I/Gene deletion              |
| 49MR2         | CCA <b>AAGCTT</b> GCCGATGCCGGAGATGAAGCGG                    | <i>Hind</i> III/Gene deletion           |
| 2374MF1       | AAGTCACCTGCCGCAGCGA                                         | Gene deletion                           |
| 2374MR1       | CG <b>GGATCC</b> CATGGCTGGGCCCTCGGTAAC                      | <i>Bam</i> HI/Gene deletion             |
| 2374MF2       | GCT <b>CTAGAG</b> CGCGGCGTGCACCGTG                          | <i>Xba</i> I/Gene deletion              |
| 2374MR2       | CCA <b>AAGCTT</b> CGCCTCGCCAAGAATCGCG                       | <i>Hind</i> III/Gene deletion           |
| 49CF          | GG <b>GGTACC</b> CCCTCCCGCTTCTATTGTGCTTGTG                  | <i>Kpn</i> I                            |
| 2374CF        | GG <b>GGTACC</b> CCGAGGCCAGCCATGCAGGA                       | <i>Kpn</i> I                            |
| gyrBF         | GGCGAGCACAATGGCATT                                          | qRT-PCR                                 |
| gyrBR         | CCATCCTTCTGCGGGATGT                                         | qRT-PCR                                 |
| hrpGF         | TGTCCACCTGATGAACGACCTT                                      | qRT-PCR                                 |
| hrpGR         | GGCGAATGCCGCAACGAA                                          | qRT-PCR                                 |
| hrpXF         | AGGCACTGACCCACTTTC                                          | qRT-PCR                                 |
| hrpXR         | ATCGGAAGCACCACTCTC                                          | qRT-PCR                                 |
| hpa1F         | AAGCCAGGACACAACGTTTCG                                       | qRT-PCR                                 |
| hpa1R         | GAAGCAGGGCCGAGATGAG                                         | qRT-PCR                                 |
| GFPF          | GCT <b>CTAGA</b> AAGTAAAGGAGAATTTT                          | <i>Xba</i> I /Subcelluar localization   |
| GFPR          | CG <b>AAGCTT</b> TTATTTGTATAGTTCATCCAT                      | <i>Sac</i> I /Subcelluar localization   |
| 49LR          | CCA <b>AAGCTT</b> GAAACATGCCGCTCTTGCG                       | <i>Hind</i> III/Subcelluar localization |
| 2374LR        | CCA <b>AAGCTT</b> GCCAGCCATGTGCTCTG                         | <i>Hind</i> III/Subcelluar localization |
| 2715LF        | GG <b>GGTACC</b> GAACTCGATGAGTGCAATGA                       | <i>Kpn</i> I/Subcelluar localization    |
| 2715LR        | CCA <b>AAGCTT</b> CATCGTGTGCGTCCGCTT                        | <i>Hind</i> III/Subcelluar localization |

Restriction enzyme sites are in bold text.

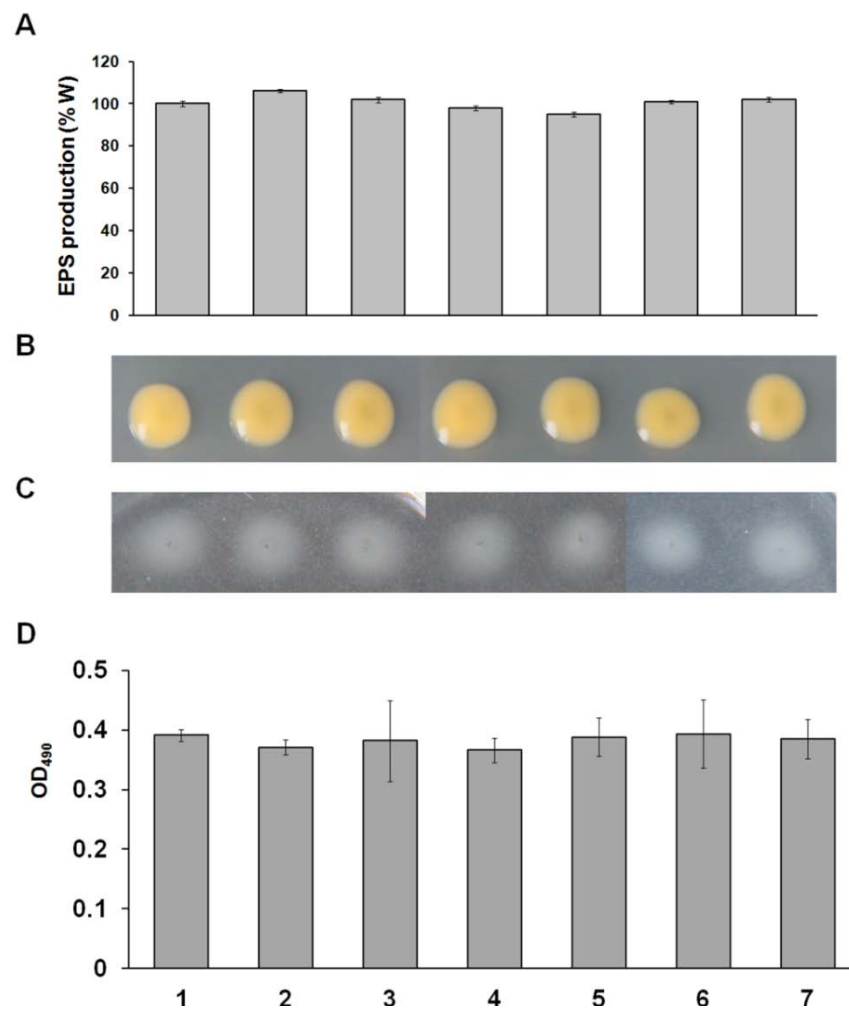

**Fig. S1. Assays for EPS production, motility and biofilm formation of  $\Delta PXO_{00049}$ ,  $\Delta PXO_{02374}$  and  $\Delta PXO_{02715}$ .**

(A and B) No significant differences in EPS production were observed between PXO99<sup>A</sup> and relevant mutants. (C)  $\Delta PXO_{00049}$ ,  $\Delta PXO_{02374}$  and  $\Delta PXO_{02715}$  displayed no change in swimming motility compared with PXO99<sup>A</sup>. (D)  $\Delta PXO_{00049}$ ,  $\Delta PXO_{02374}$  and  $\Delta PXO_{02715}$  showed no change in biofilm formation compared with PXO99<sup>A</sup>. 1, Wildtype PXO99<sup>A</sup>; 2,  $\Delta PXO_{00049}$ ; 3,  $\Delta PXO_{00049}$  (pB49); 4,  $\Delta PXO_{02374}$ ; 5,  $\Delta PXO_{02374}$  (pB2374); 6,  $\Delta PXO_{02715}$ ; 7,  $\Delta PXO_{02715}$  (pB2715).

| Subcellular Location   | Bacterial cell with fluorescence                                                  | The average brightness value of the selected area in bacterial cell |                      |
|------------------------|-----------------------------------------------------------------------------------|---------------------------------------------------------------------|----------------------|
| Multisite              | 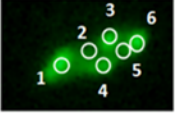 | 1: $177.91 \pm 5.85$                                                | 2: $101.99 \pm 1.74$ |
|                        |                                                                                   | 3: $166.95 \pm 6.46$                                                | 4: $162.57 \pm 4.59$ |
|                        |                                                                                   | 5: $105.11 \pm 1.03$                                                | 6: $176.93 \pm 6.48$ |
| bipolar                |  | 1: $189.52 \pm 3.13$                                                | 2: $104.16 \pm 6.24$ |
|                        |                                                                                   | 3: $172.71 \pm 5.11$                                                |                      |
| Nonpolar               |  | 1: $466.81 \pm 6.84$                                                | 2: $460.99 \pm 8.72$ |
|                        |                                                                                   | 3: $463.2 \pm 8.18$                                                 |                      |
| low level fluorescence |  | 1: $60.81 \pm 1.14$                                                 | 2: $58.99 \pm 3.0$   |
|                        |                                                                                   | 3: $59.20 \pm 4.16$                                                 |                      |

**Fig. S2. Definition of the subcellular location of PilZ-domain proteins.**

The subcellular localization of proteins in *Xoo* strains was detected by using Fluorescence Microscope and the CellSens Dimension software was used for analysis the average brightness value of the selected area in bacteria cell. The average brightness value  $>160$  were defined as the fluorescence location of the protein. Multisite location contains three or four fluorescence sites in the cell. The cell containing the fluorescence sites in bipolar were defined as bipolar location. The whole cell with high level fluorescence were defined as nonpolar location.
